# Supplementary material for: Rational design of antisense oligonucleotides targeting single nucleotide polymorphisms for potent and allele selective suppression of mutant Huntingtin in the CNS
Source: PubMed Central journal article supplement — Nucleic Acids Res. 2013 Aug 19;41(21):9634–50. doi: 10.1093/nar/gkt725 (PMC3834808; doi:10.1093/nar/gkt725), 2013-08-19
Supplement: supp_gkt725_nar-01560-y-2013-File001.pdf [file supp_gkt725_nar-01560-y-2013-File001.pdf]

## Supplementary Information

### **Rational Design of Antisense Oligonucleotides Targeting Single Nucleotide Polymorphisms for Potent and Allele Selective Suppression of Mutant Huntingtin in the CNS**

Michael E. Oestergaard,<sup>1</sup> Amber L. Southwell,<sup>2</sup> Holly Kordasiewicz,<sup>1</sup> Andrew T. Watt,<sup>1</sup> Niels H. Skotte,<sup>2</sup> Crystal N. Doty,<sup>2</sup> Kuljeet Vaid,<sup>2</sup> Erika B. Villanueva,<sup>2</sup> Eric E. Swayze,<sup>1</sup> C. Frank Bennett,<sup>1</sup> Michael R. Hayden<sup>2</sup> and Punit P. Seth<sup>1\*</sup>

<sup>1</sup> Isis Pharmaceuticals, 2855 Gazelle Court, Carlsbad, California, USA.

<sup>2</sup> Centre for Molecular Medicine and Therapeutics, Child and Family Research Institute, University of British Columbia, Vancouver, British Columbia, Canada.

\*Email: [pseth@isisph.com](mailto:pseth@isisph.com), tel 760-603-2587

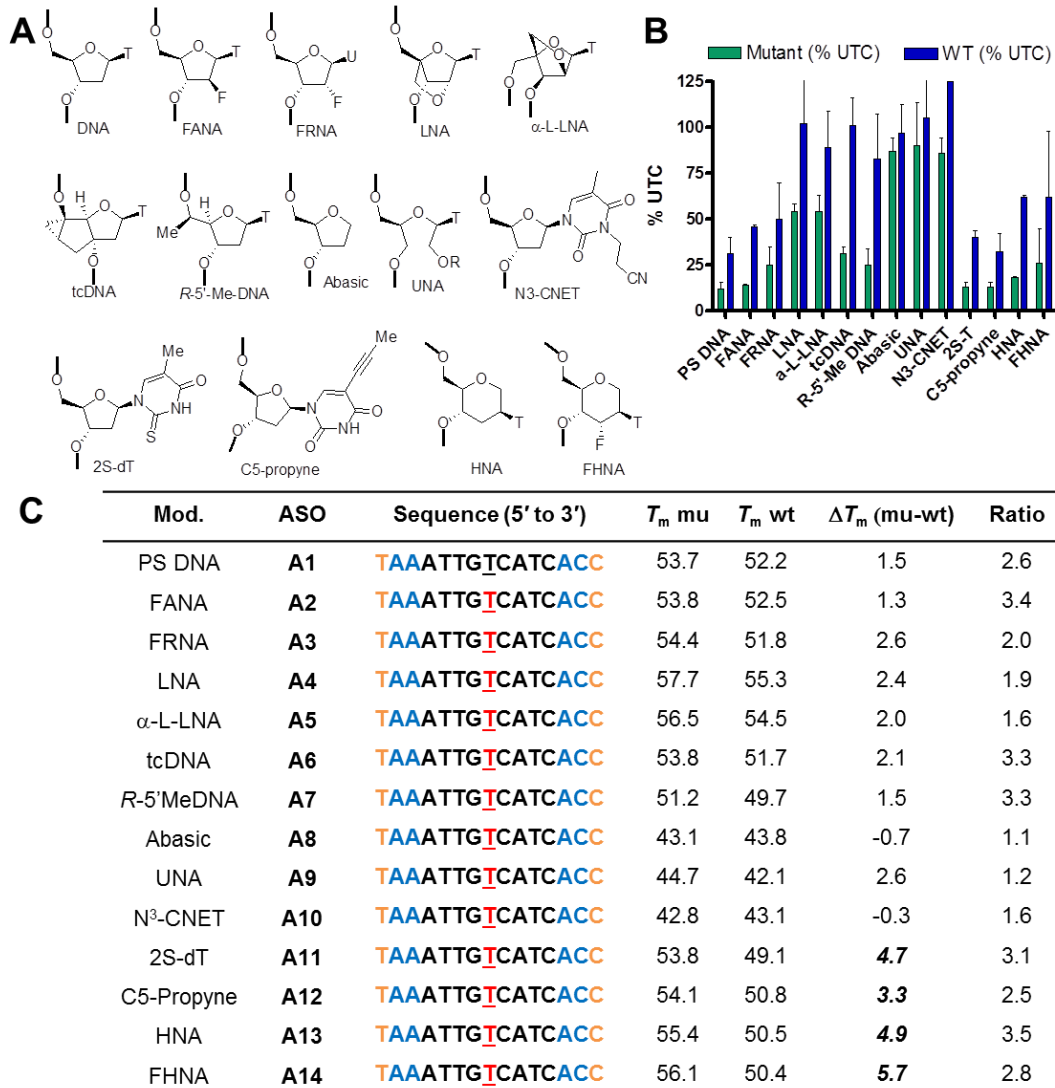

**Supplementary Figure S1.** Introducing chemical modifications into the ASO across from the SNP site does not improve allele selectivity substantially (A) Structures of modifications investigated. (B) Evaluation of ASOs **A1-A14** in GM4022 fibroblasts at a single dose of 2  $\mu$ M delivered by electroporation. (C) Summary of sequence, modification patterns,  $T_m$  of matched versus mismatched RNA and ratio of *wtHTT*/*muHTT* mRNA reduction in human GM4022 fibroblasts. Black letters indicate DNA, orange letters indicate MOE and blue nucleotides indicate S-cEt nucleotides, underlined red letter is the modified nucleotide across from the SNP, all internucleosidic linkages are phosphorothioate. All error bars are in  $\pm$ std. dev.

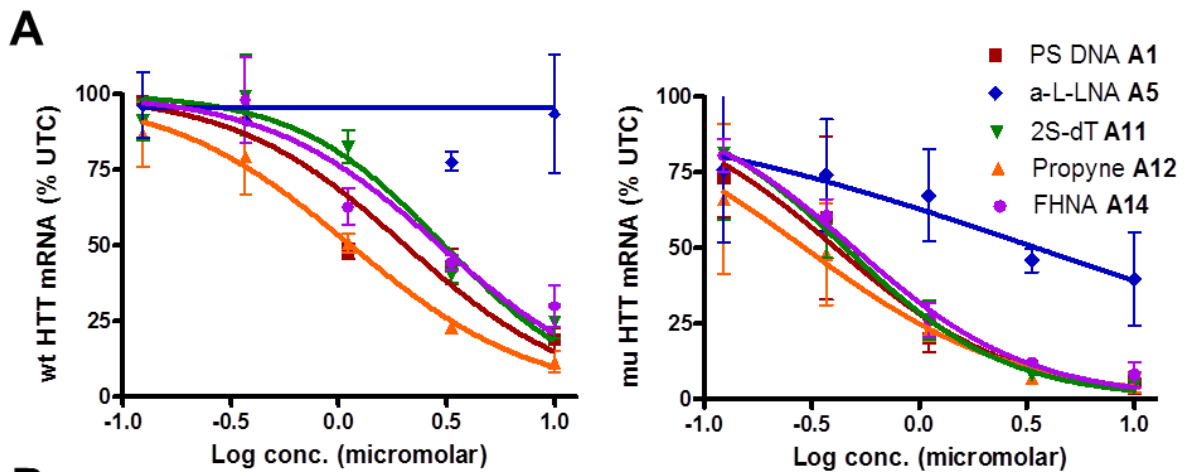

**B**

| ASO | Sequence (5' to 3')      | Chemistry  | IC <sub>50</sub> (μM) | Fold Select. | T <sub>m</sub> (Mu) | T <sub>m</sub> (WT) | ΔT <sub>m</sub> (Mu-WT) |
|-----|--------------------------|------------|-----------------------|--------------|---------------------|---------------------|-------------------------|
| A1  | TAAATTG <u>I</u> CATCACC | PS DNA     | 0.41                  | 5.0          | 53.7                | 52.2                | 1.5                     |
| A5  | TAAATTG <u>I</u> CATCACC | α-L-LNA    | 3.5                   | >3           | 56.5                | 54.5                | 2.0                     |
| A11 | TAAATTG <u>I</u> CATCACC | 2S-dT      | 0.45                  | 6.9          | 53.8                | 49.1                | 4.7                     |
| A12 | TAAATTG <u>U</u> CATCACC | C5-propyne | 0.29                  | 3.8          | 54.1                | 50.8                | 3.3                     |
| A14 | TAAATTG <u>I</u> CATCACC | FHNA       | 0.5                   | 6.0          | 56.1                | 50.4                | 5.7                     |

**Supplementary Figure S2.** Improved discrimination of GT wobble base-pair does not improve allele selectivity. (A) Dose dependent reduction of mu*HTT* mRNA and wt*HTT* mRNA using ASOs **A1**, **A5**, **A11**, **A12** and **A14** in human GM4022 fibroblasts. (B) Sequence, chemical design, potency and selectivity in cell culture, and  $T_m$  versus matched and mismatched RNA, of ASOs **A1**, **A5**, **A11**, **A12** and **A14**.

**Supplementary Figure S3. (A and B)** Time course for cleavage of **A1/RNA<sup>mu</sup>** and **A1/RNA<sup>wt</sup>** heteroduplexes by recombinant human RNase H1, using LCMS to monitor reaction progress. **(C)** Precise identity of cleavage fragments identified from LCMS assay (-4 charge state). Bold underlined nucleotide represents the SNP site while the nucleotides in blue represent the two nucleotide shift between cleavage sites “a” and “b”.

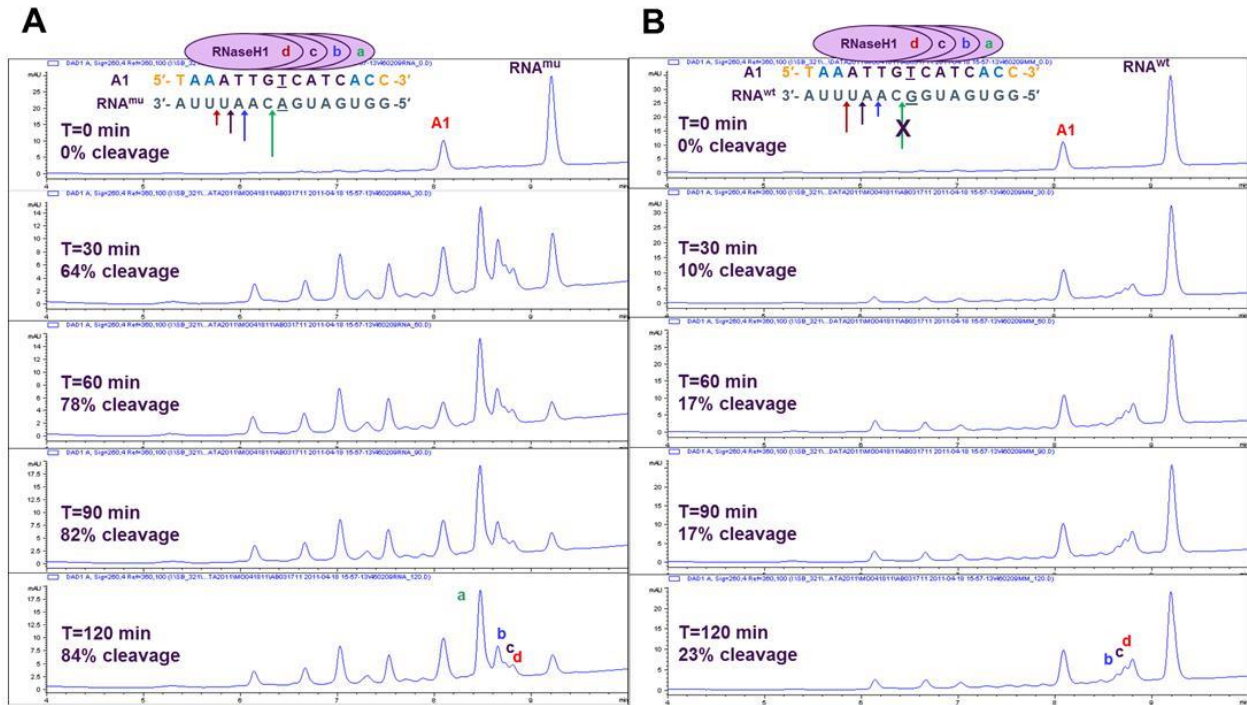

**C.**

Cleavage of fully complementary **RNA<sup>mu</sup>** 5'-AGACUUUUUCUGGUGAUG**A**CAAUUUAUAA

| Cleavage | Fragment sequence                      | m/z found | m/z calculated | MW (Da) |
|----------|----------------------------------------|-----------|----------------|---------|
| <b>a</b> | 5'-AGACUUUUUCUGGUGAUG <b>A</b> -3'     | 1509.1    | 1508.9         | 6039.8  |
|          | 5'-AGACUUUUUCUGGUGAUG <b>AC</b> -3'    | Not found | 1585.2         | 6344.9  |
| <b>b</b> | 5'-AGACUUUUUCUGGUGAUG <b>ACA</b> -3'   | 1667.8    | 1667.5         | 6674.1  |
| <b>c</b> | 5'-AGACUUUUUCUGGUGAUG <b>ACAA</b> -3'  | 1750.0    | 1749.8         | 7003.2  |
| <b>d</b> | 5'-AGACUUUUUCUGGUGAUG <b>ACAAU</b> -3' | 1825.9    | 1826.3         | 7309.4  |

Cleavage of mismatched **RNA<sup>wt</sup>** 5'-AGACUUUUUCUGGUGAUG**G**CAAUUUAUAA

| Cleavage | Fragment sequence                      | m/z found | m/z calculated | MW (Da) |
|----------|----------------------------------------|-----------|----------------|---------|
| <b>a</b> | 5'-AGACUUUUUCUGGUGAUG <b>G</b> -3'     | not found | 1508.9         | 6039.8  |
|          | 5'-AGACUUUUUCUGGUGAUG <b>GC</b> -3'    | not found | 1589.2         | 6360.9  |
| <b>b</b> | 5'-AGACUUUUUCUGGUGAUG <b>GCA</b> -3'   | 1671.2    | 1671.5         | 6690.1  |
| <b>c</b> | 5'-AGACUUUUUCUGGUGAUG <b>GCAA</b> -3'  | 1755.0    | 1753.8         | 7019.2  |
| <b>d</b> | 5'-AGACUUUUUCUGGUGAUG <b>GCAAU</b> -3' | 1831.3    | 1830.3         | 7325.3  |

**Supplementary Figure 4.**  $T_m$  of selected ASOs versus matched and mismatched RNA showing that chemical modification at positions 5 and 6 do not alter binding affinity of the ASO for the matched and mismatched RNA.

| Mod.       | ASO | Sequence (5' to 3')               | $T_m$ (mu) | $T_m$ (wt) | $IC_{50}$ ( $\mu$ M) | Fold<br>muHTT<br>Select. |
|------------|-----|-----------------------------------|------------|------------|----------------------|--------------------------|
| PS DNA     | A1  | TAAATTG <u>T</u> CATCACC          | 53.7       | 52.2       | 0.29                 | 6.9                      |
| 2S-dT      | A16 | TAAAT <u>T</u> G <u>T</u> CATCACC | 54.8       | 52.8       | 0.31                 | >48                      |
| 2S-dT      | A17 | TAAAT <u>T</u> G <u>T</u> CATCACC | 55.6       | 53.9       | 0.21                 | 4.8                      |
| R-5'Me-DNA | A18 | TAAAT <u>T</u> G <u>T</u> CATCACC | 52.2       | 50.0       | 0.15                 | 4.6                      |
| R-5'Me-DNA | A19 | TAAAT <u>T</u> G <u>T</u> CATCACC | 52.0       | 49.7       | 0.31                 | 5.7                      |
| FANA       | A22 | TAAAT <u>T</u> G <u>T</u> CATCACC | 53.4       | 51.3       | 0.14                 | 7.4                      |
| FANA       | A23 | TAAAT <u>T</u> G <u>T</u> CATCACC | 55.0       | 53.3       | 0.11                 | 7.1                      |

Black letters indicate DNA, orange letters indicate MOE and blue nucleotides indicate S-cEt nucleotides, underlined letter is the nucleotide across from the SNP site, red letter indicates site of chemical modification. All internucleosidic linkages are phosphorothioate.

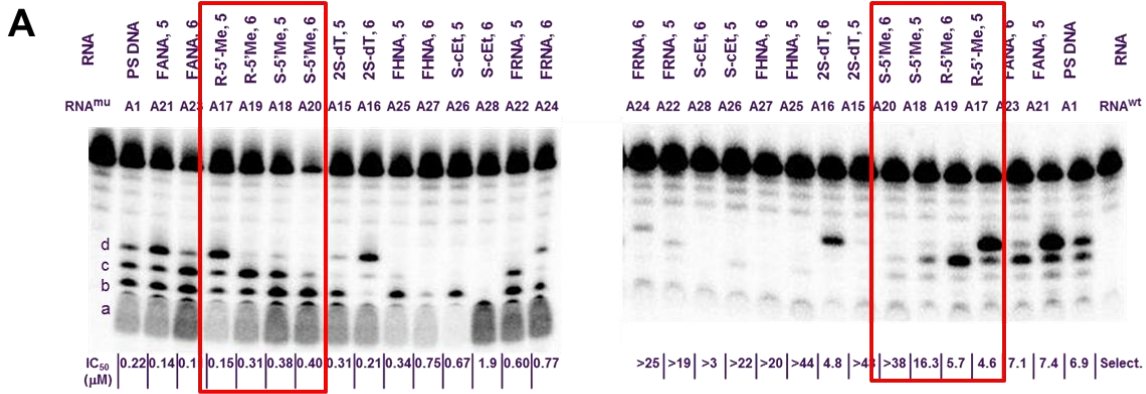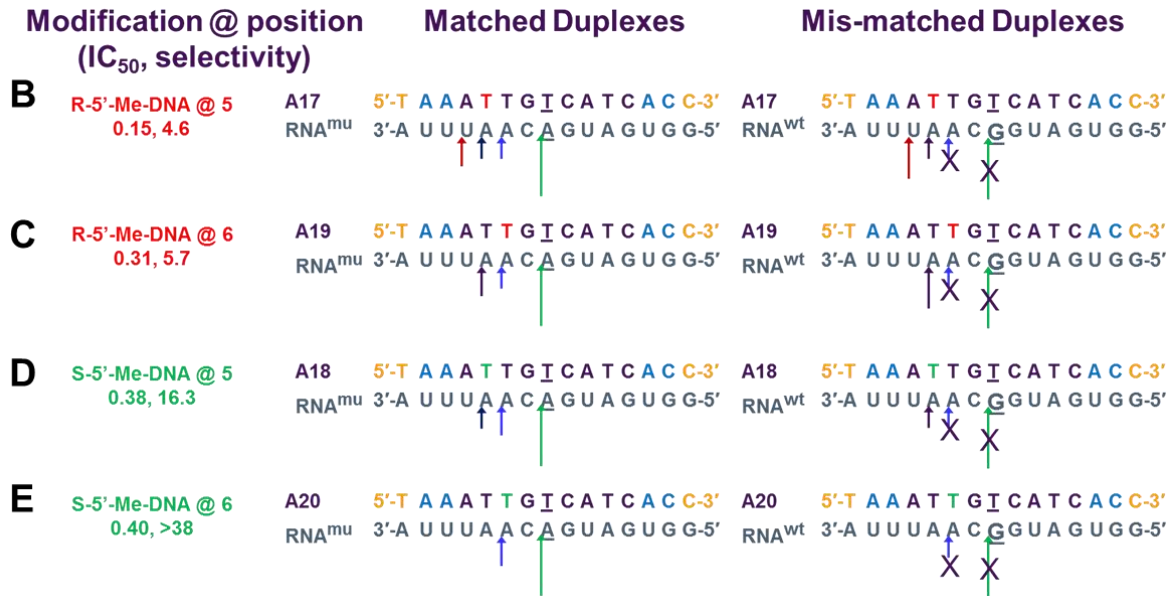

**Supplementary Figure S5.** Rationale for improved allele selectivity observed with S-5'-Me-DNA modified ASOs **A18** and **A20** versus R-5'-Me-DNA ASOs **A17** and **A19**. (A) Mapping human RNase H cleavage patterns for modified ASOs versus matched (**RNA<sup>mu</sup>**) and mismatched (**RNA<sup>wt</sup>**) RNA using gel electrophoresis. Pictorial representation of RNase H1 cleavage patterns versus matched (**RNA<sup>mu</sup>**) and mismatched (**RNA<sup>wt</sup>**) RNA for (B) **A17** with R-5'-Me-DNA at position 5 (C) **A19** with R-5'-Me-DNA at position 6 (D) **A18** with S-5'-Me-DNA at position 5 (E) **A20** with S-5'-Me-DNA at position 6.

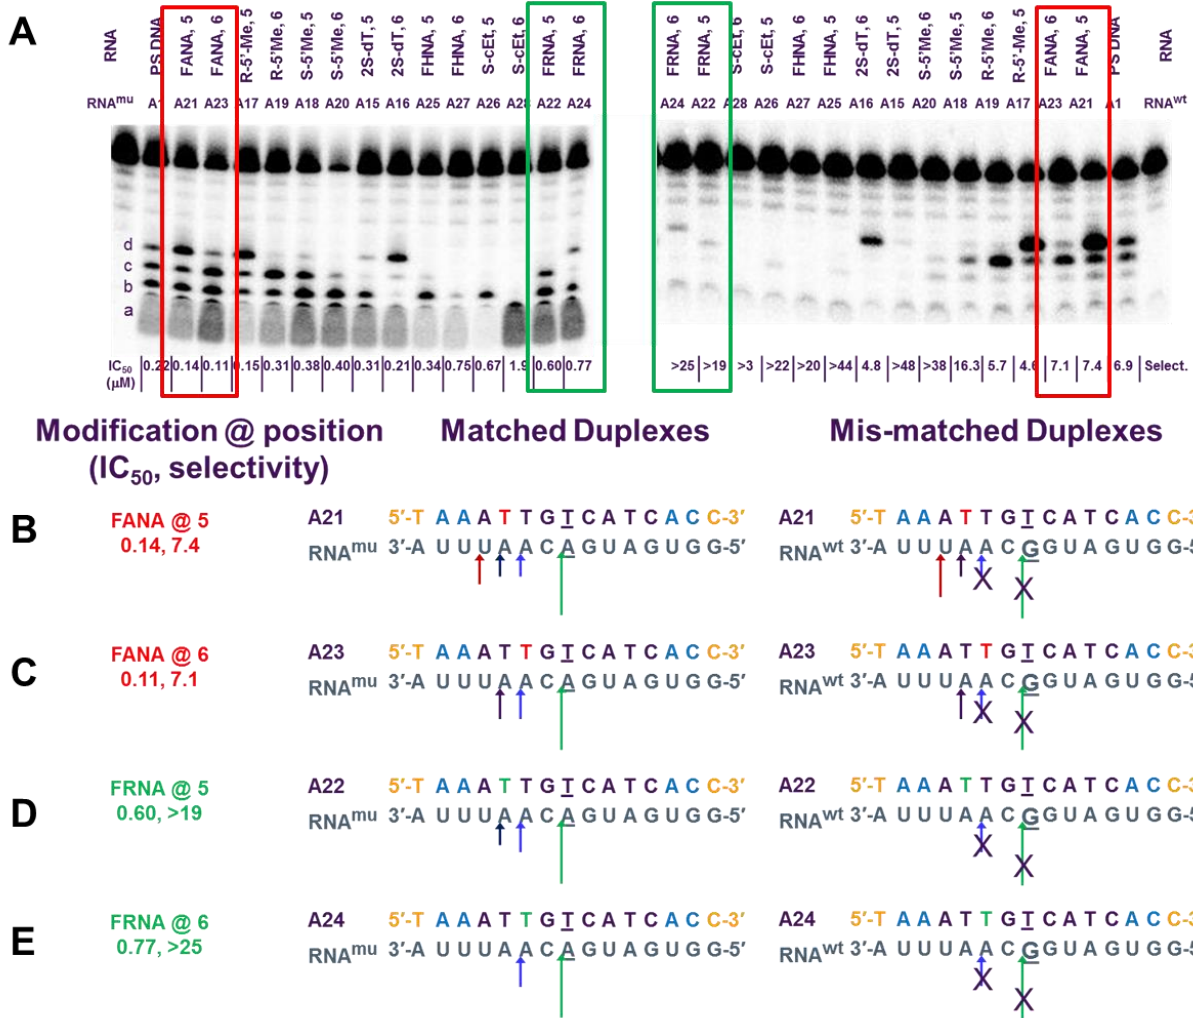

**Supplementary Figure S6.** Rationale for improved allele selectivity observed with FRNA modified ASOs **A22** and **A24** versus FANA modified ASOs **A21** and **A23**. (A) Mapping RNase H1 cleavage patterns for modified ASOs versus matched (**RNA<sup>mu</sup>**) and mismatched (**RNA<sup>wt</sup>**) RNA using gel electrophoresis. Pictorial representation of RNase H1 cleavage patterns versus matched (**RNA<sup>mu</sup>**) and mismatched (**RNA<sup>wt</sup>**) RNA for (B) **A22** with FANA at position 5 (C) **A24** with FANA at position 6 (D) **A22** with FRNA at position 5 (E) **A24** with FRNA at position 6.



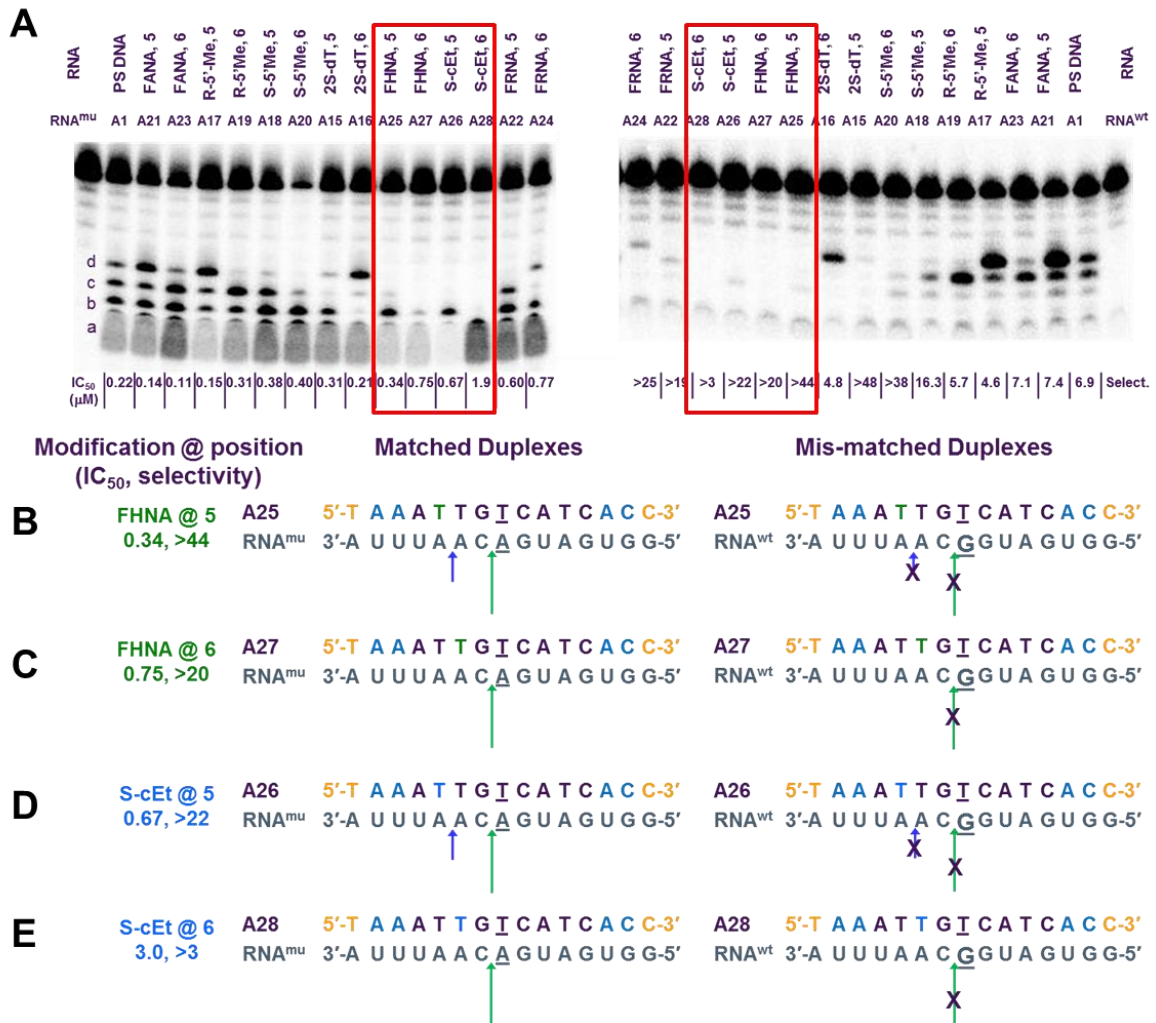

**Supplementary Figure S7.** Rationale for improved allele selectivity observed with FHNA (A25 and A27) and S-cEt (A26 and A28) modified ASOs. (a) Mapping RNase H1 cleavage patterns for modified ASOs versus matched (RNA<sup>mu</sup>) and mismatched (RNA<sup>wt</sup>) RNA using gel electrophoresis. Pictorial representation of RNase H1 cleavage patterns versus matched (RNA<sup>mu</sup>) and mismatched (RNA<sup>wt</sup>) RNA for (b) A25 with FHNA at position 5 (c) A27 with FHNA at position 6 (D) A26 with S-cEt at position 5 (E) A28 with S-cEt at position 6.
